# Supplementary material for: Phytochemical and Biological Studies of Nepeta asterotricha Rech. f. (Lamiaceae): Isolation of Nepetamoside
Source: PubMed Central journal article supplement (PMC6539229; doi:10.3390/molecules24091684), 2019-04-30

## Supplementary Material

### Phytochemical and Biological Studies of *Nepeta asterotricha* Rech. f. (Lamiaceae): Isolation of Nepetamoside

Seyed Mostafa Goldansaz<sup>1,2</sup>, Carmen Festa<sup>2</sup>, Ester Pagano<sup>2</sup>, Simona De Marino<sup>2</sup>, Claudia Finamore<sup>2</sup>, Olga Alessandra Parisi<sup>2</sup>, Francesca Borrelli<sup>2</sup>, Ali Sonboli<sup>1</sup>, Maria Valeria D'Auria<sup>2,\*</sup>

- 1 Department of Biology, Medicinal Plants and Drugs Research Institute, Shahid Beheshti University, G.C. Evin, Tehran, Iran
- 2 Department of Pharmacy, School of Medicine and Surgery, University of Naples "Federico II", Via D. Montesano 49, 80131 Naples, Italy

#### Table of contents:

|                                                                                               |    |
|-----------------------------------------------------------------------------------------------|----|
| <b>Figures S1 and S2.</b> <sup>1</sup> H and <sup>13</sup> C NMR spectra of compound <b>1</b> | S2 |
| <b>Figures S3 and S4.</b> COSY and HSQC spectra of compound <b>1</b>                          | S3 |
| <b>Figures S5 and S6.</b> HMBC and HRESIMS spectra of compound <b>1</b>                       | S4 |
| <b>Figures S7 and S8.</b> <sup>1</sup> H-NMR spectra of compounds <b>2</b> and <b>3</b>       | S5 |
| <b>Figures S9 and S10.</b> <sup>1</sup> H-NMR spectra of compounds <b>4</b> and <b>5</b>      | S6 |
| <b>Figures S11 and S12.</b> <sup>1</sup> H-NMR spectra of compounds <b>6</b> and <b>7</b>     | S7 |
| <b>Figures S13 and S14.</b> <sup>1</sup> H-NMR spectra of compounds <b>8</b> and <b>9</b>     | S8 |
| <b>Figures S15 and S16.</b> <sup>1</sup> H-NMR spectra of compounds <b>10</b> and <b>11</b>   | S9 |

**Figure S1.**  $^1\text{H}$  NMR (500 MHz,  $\text{CD}_3\text{OD}$ ) of compound **1**

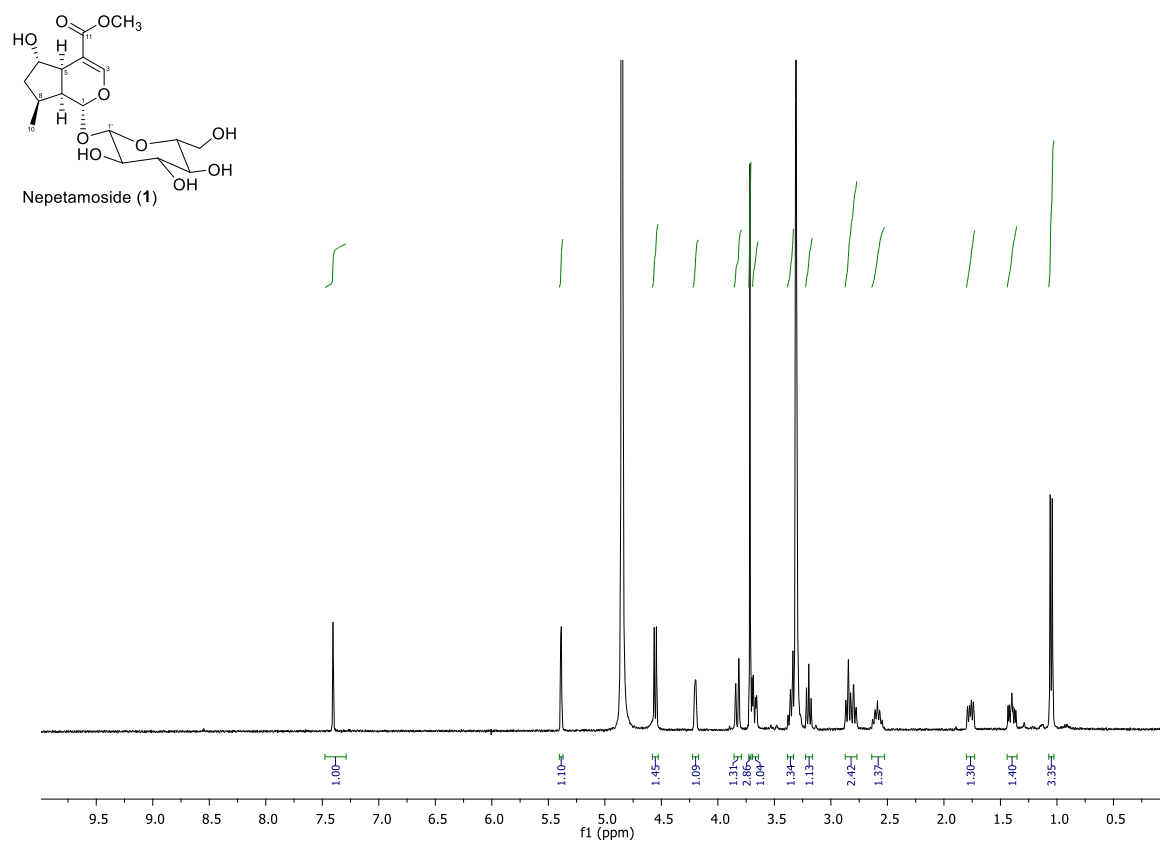

**Figure S2.**  $^{13}\text{C}$  NMR (100 MHz,  $\text{CD}_3\text{OD}$ ) of compound **1**

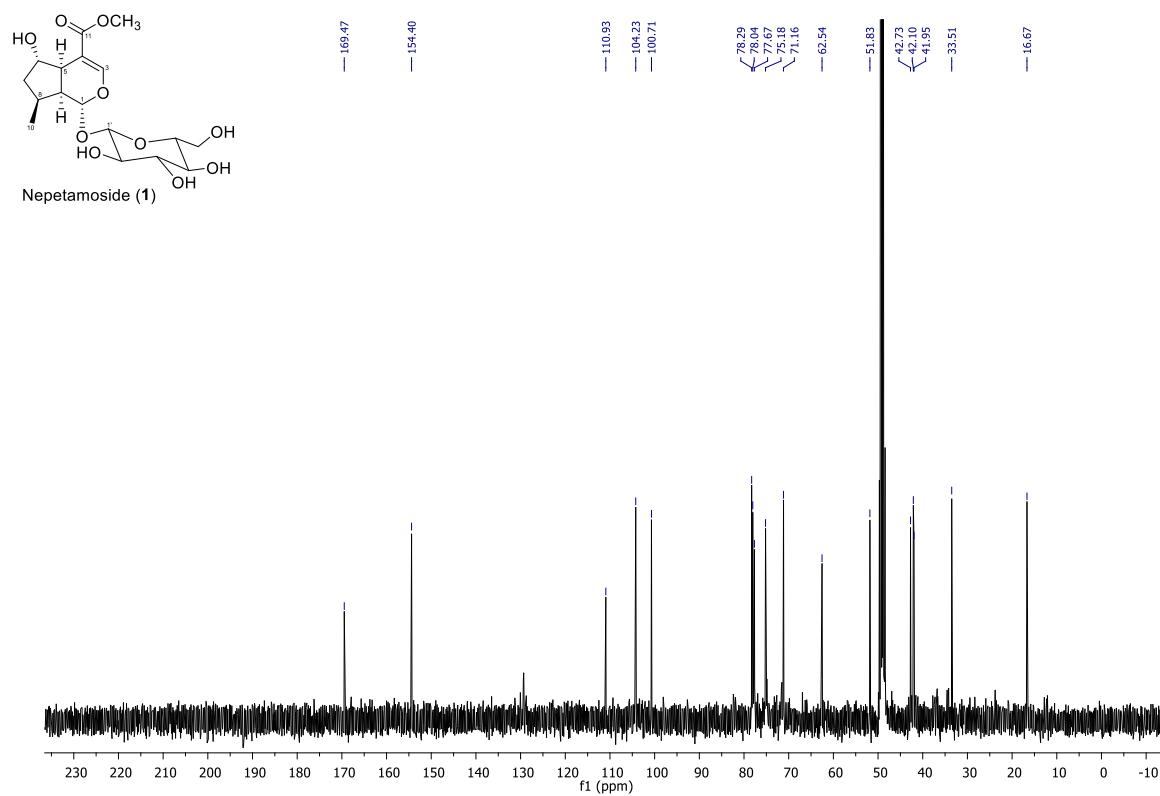

**Figure S3.** COSY spectrum (400 MHz, CD<sub>3</sub>OD) of compound **1**

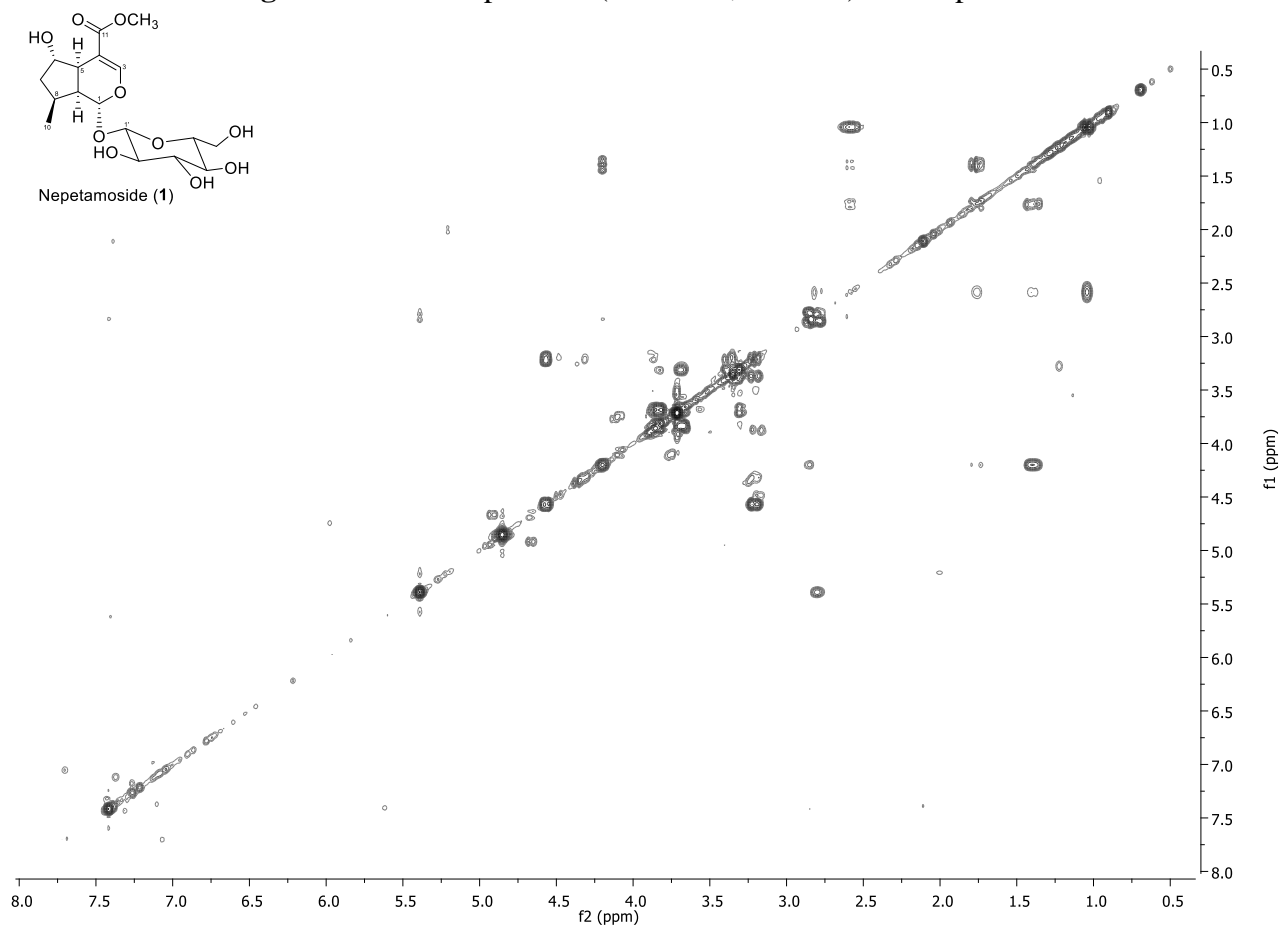

**Figure S4.** HSQC spectrum (400 MHz, CD<sub>3</sub>OD) of compound **1**

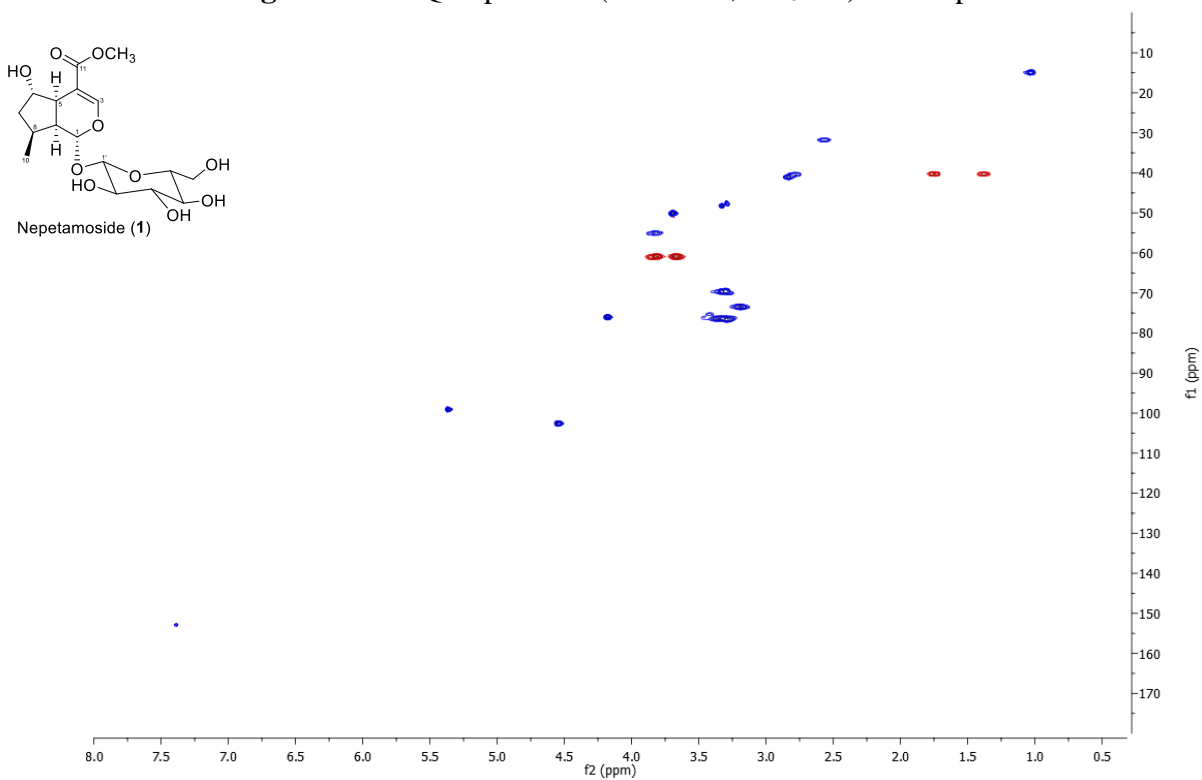

**Figure S5.** HMBC spectrum (400 MHz, CD<sub>3</sub>OD) of compound **1**

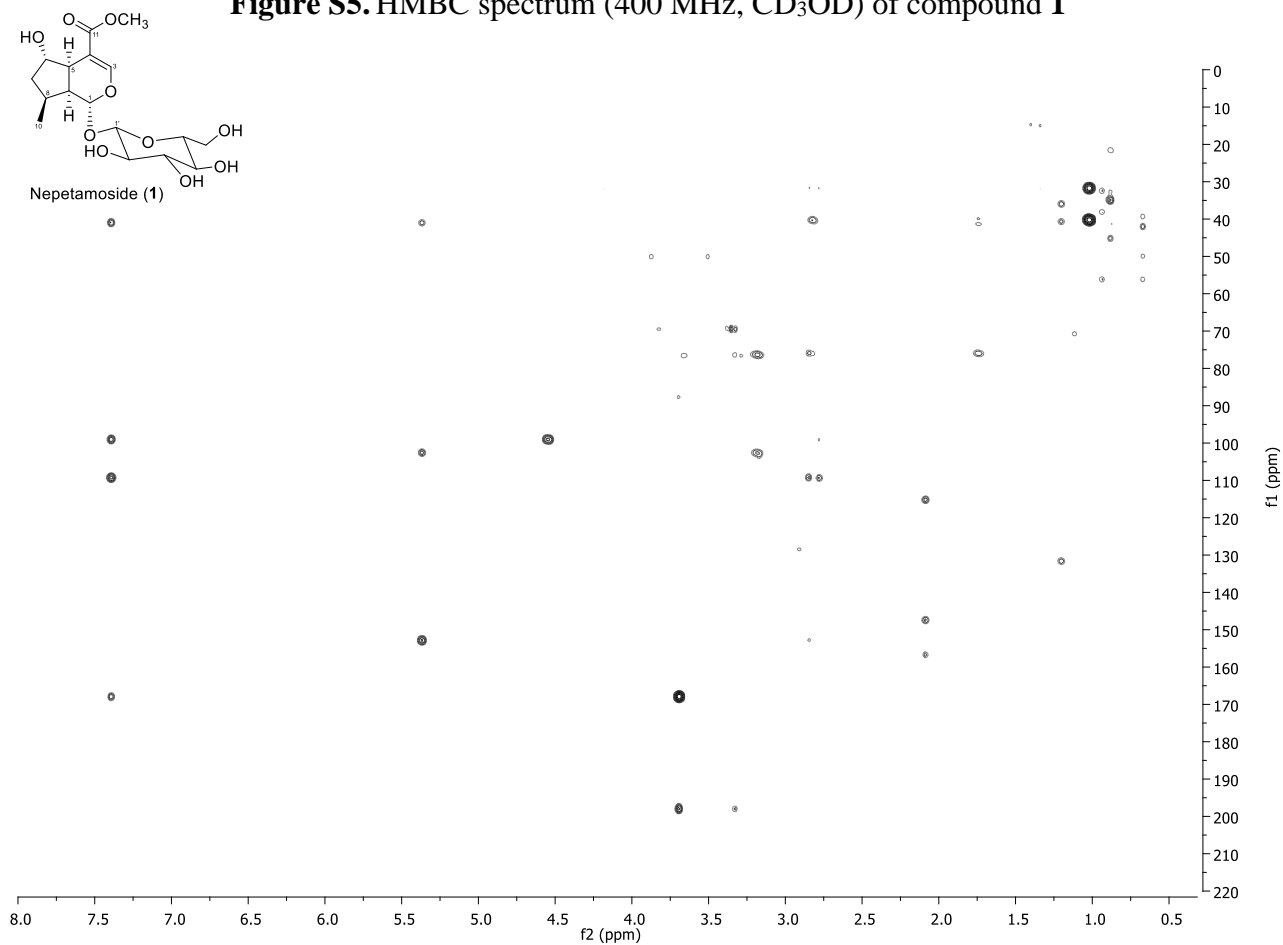

**Figure S6.** HRESIMS (positive ion mode) of compound **1**

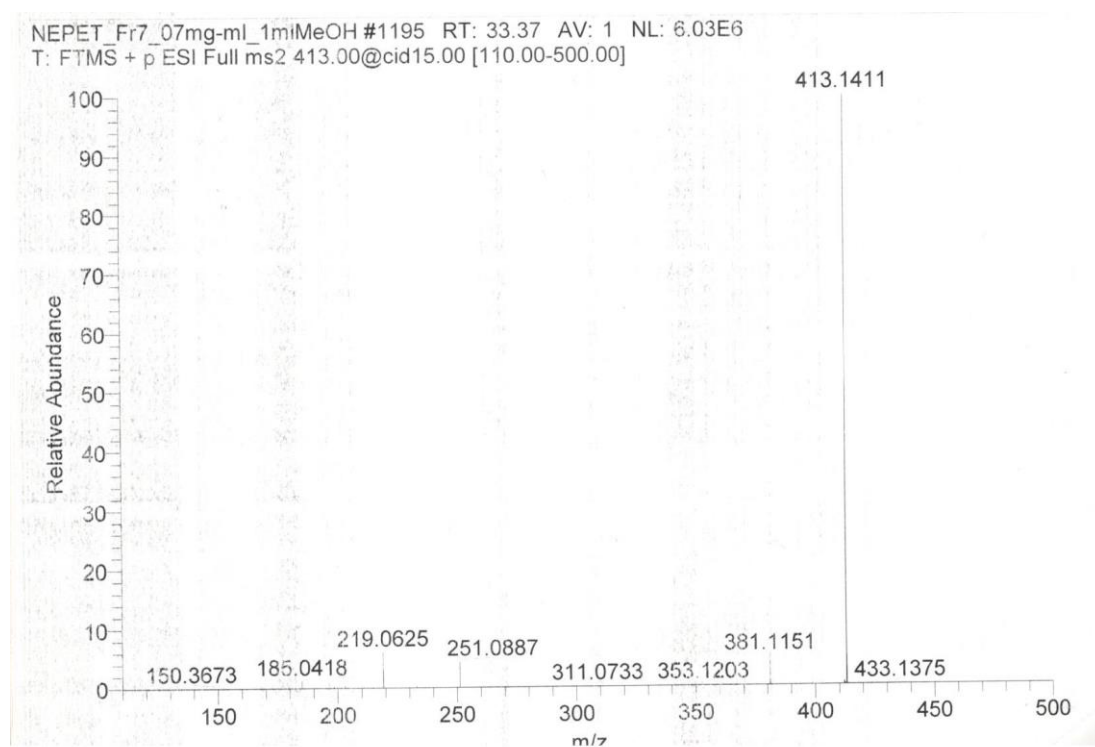

**Figure S7.**  $^1\text{H}$  NMR (500 MHz,  $\text{CD}_3\text{OD}$ ) of compound **2**

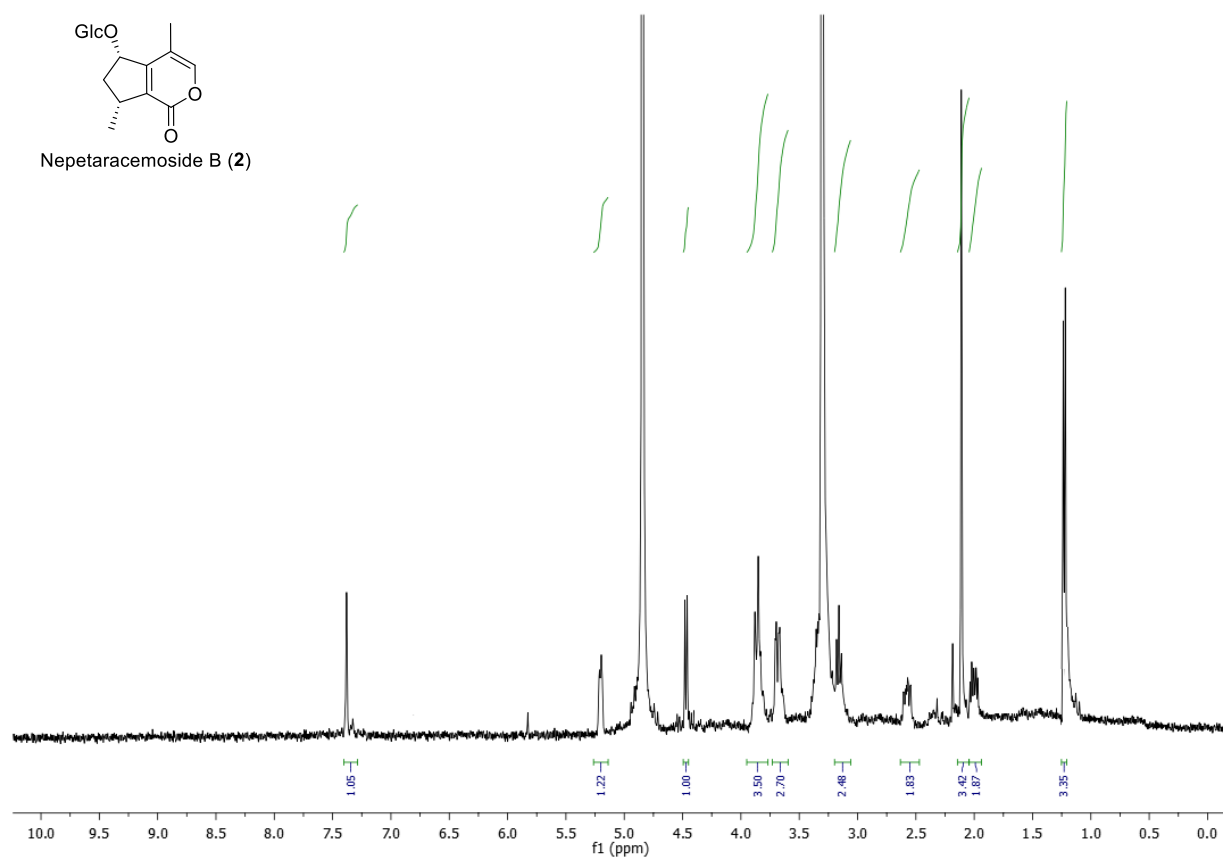

**Figure S8.**  $^1\text{H}$  NMR (500 MHz,  $\text{CD}_3\text{OD}$ ) of compound **3**

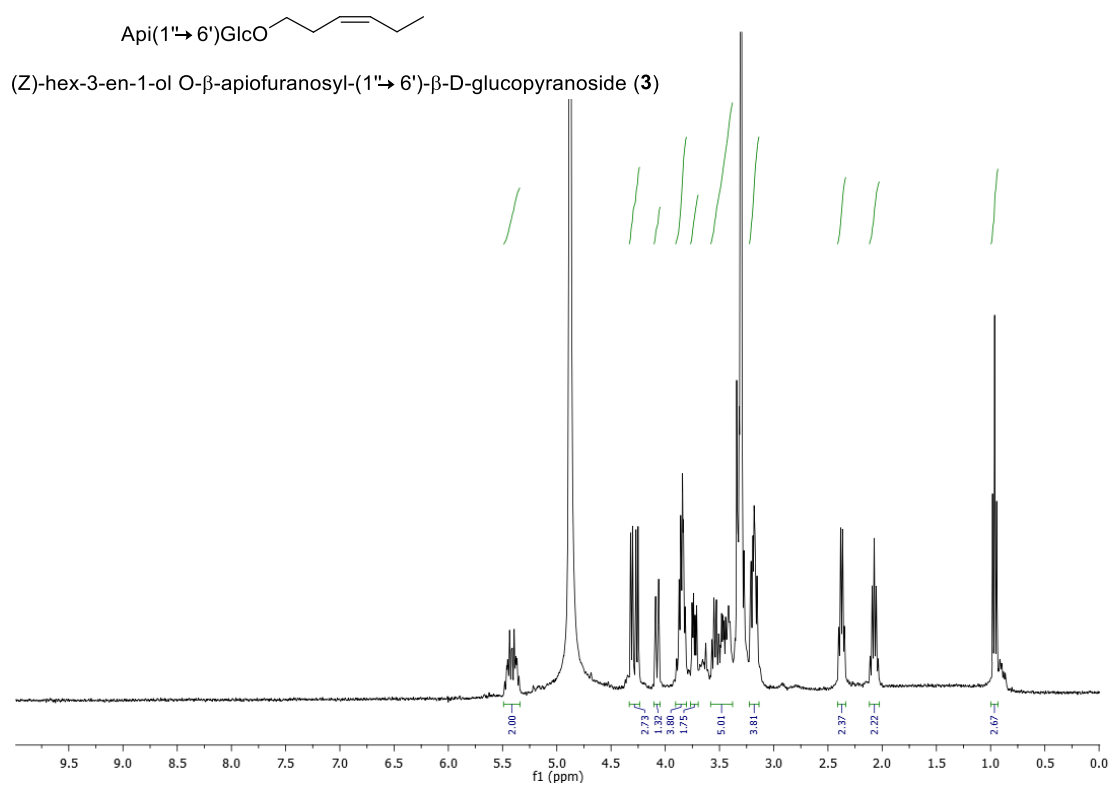

**Figure S9.**  $^1\text{H}$  NMR (500 MHz,  $\text{CD}_3\text{OD}$ ) of compound **4**

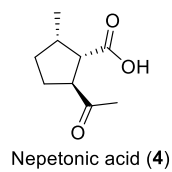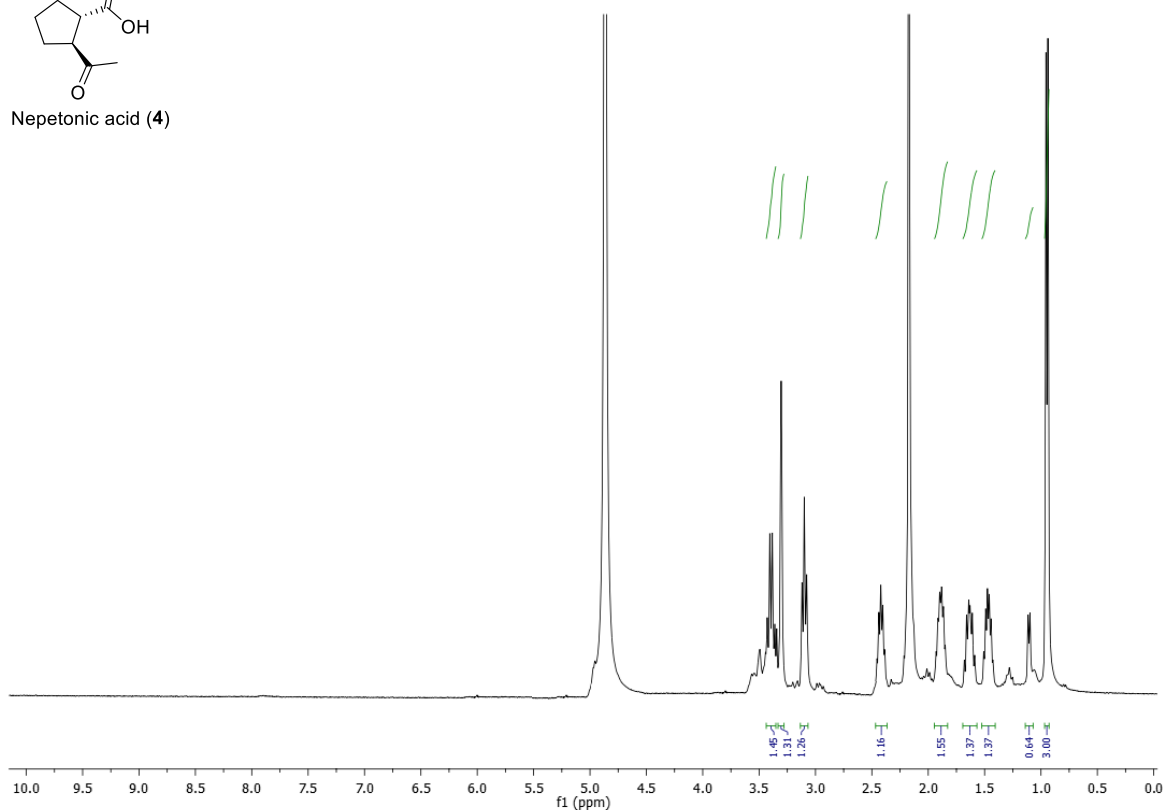

**Figure S10.**  $^1\text{H}$  NMR (500 MHz,  $\text{CD}_3\text{OD}$ ) of compound **5**

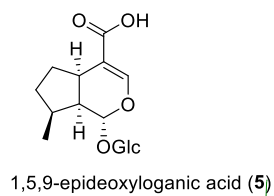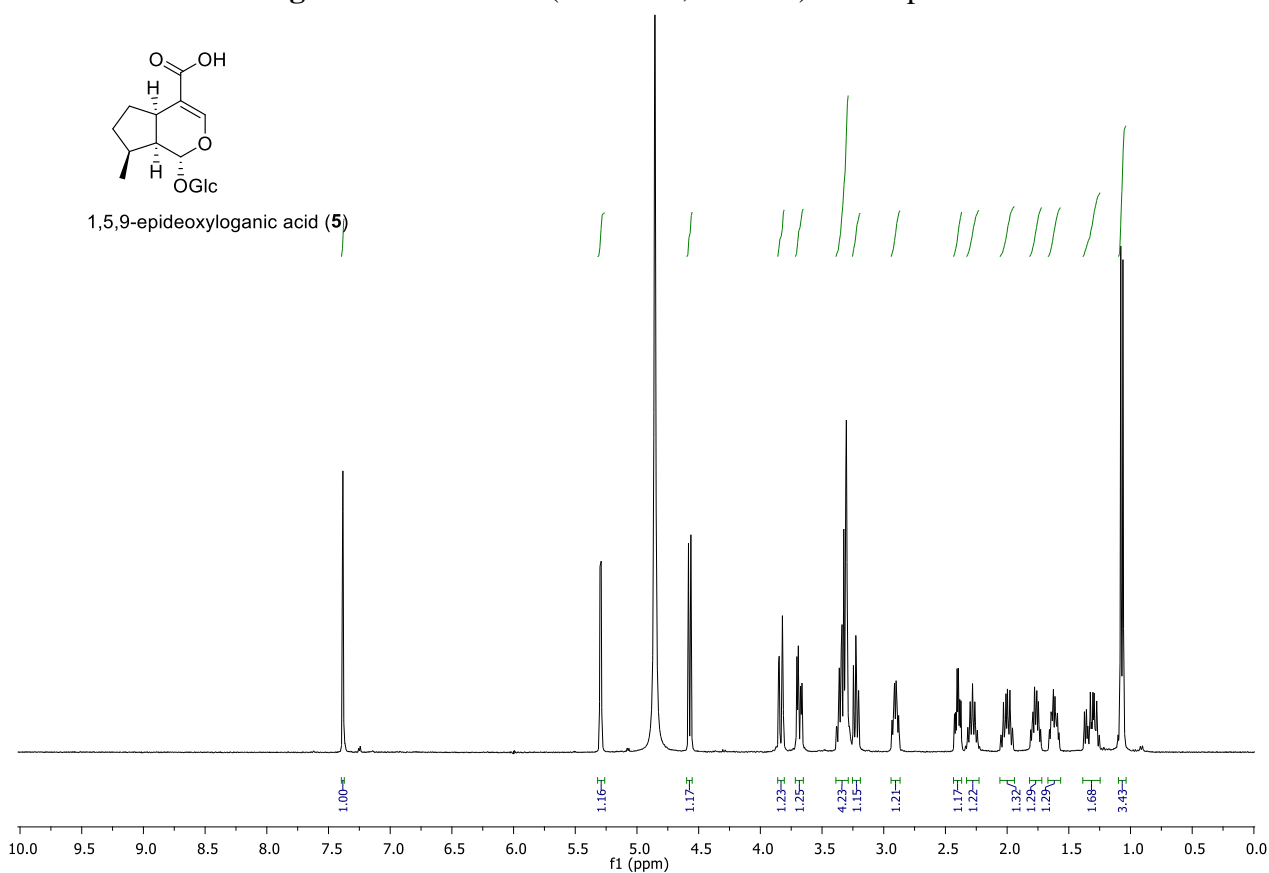

**Figure S11.**  $^1\text{H}$  NMR (500 MHz,  $\text{CD}_3\text{OD}$ ) of compound **6**

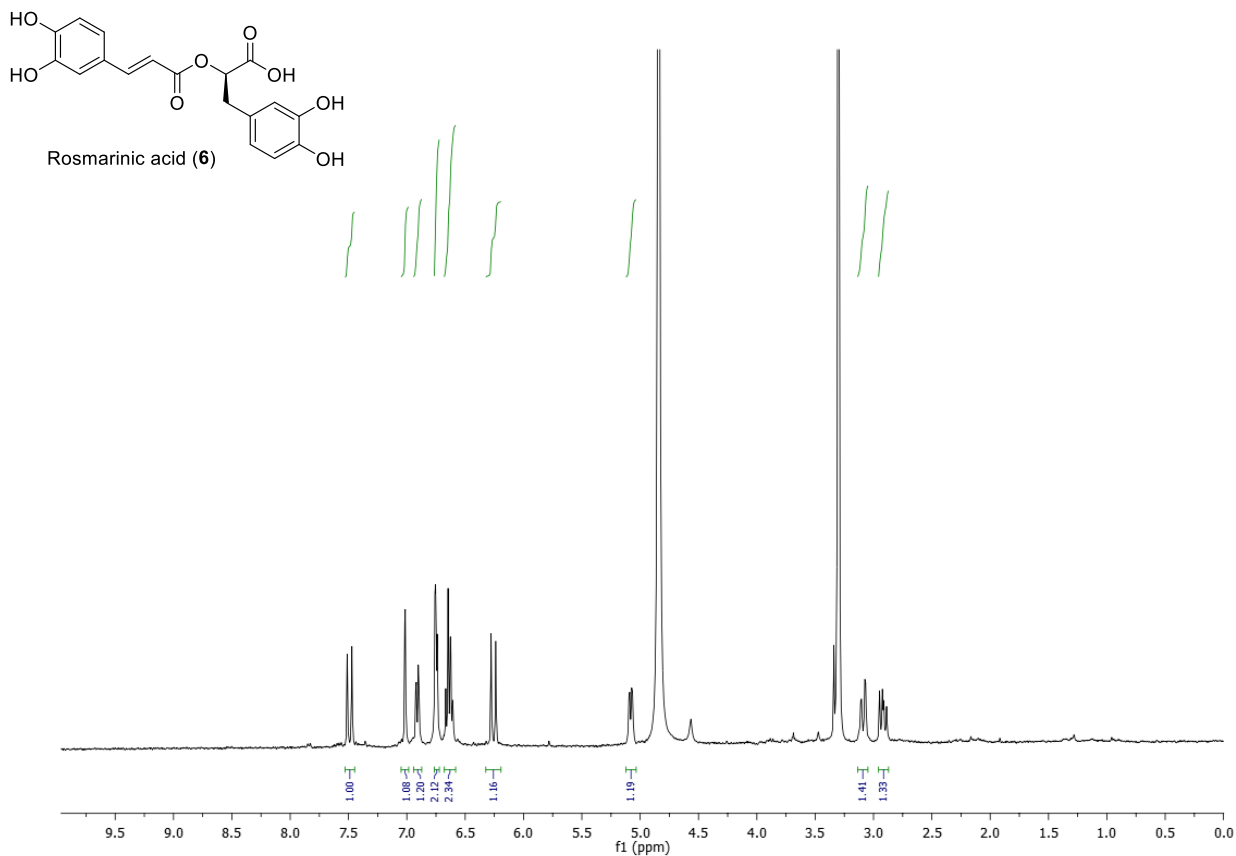

**Figure S12.** <sup>1</sup>H NMR (500 MHz, CD<sub>3</sub>OD) of compound **7**

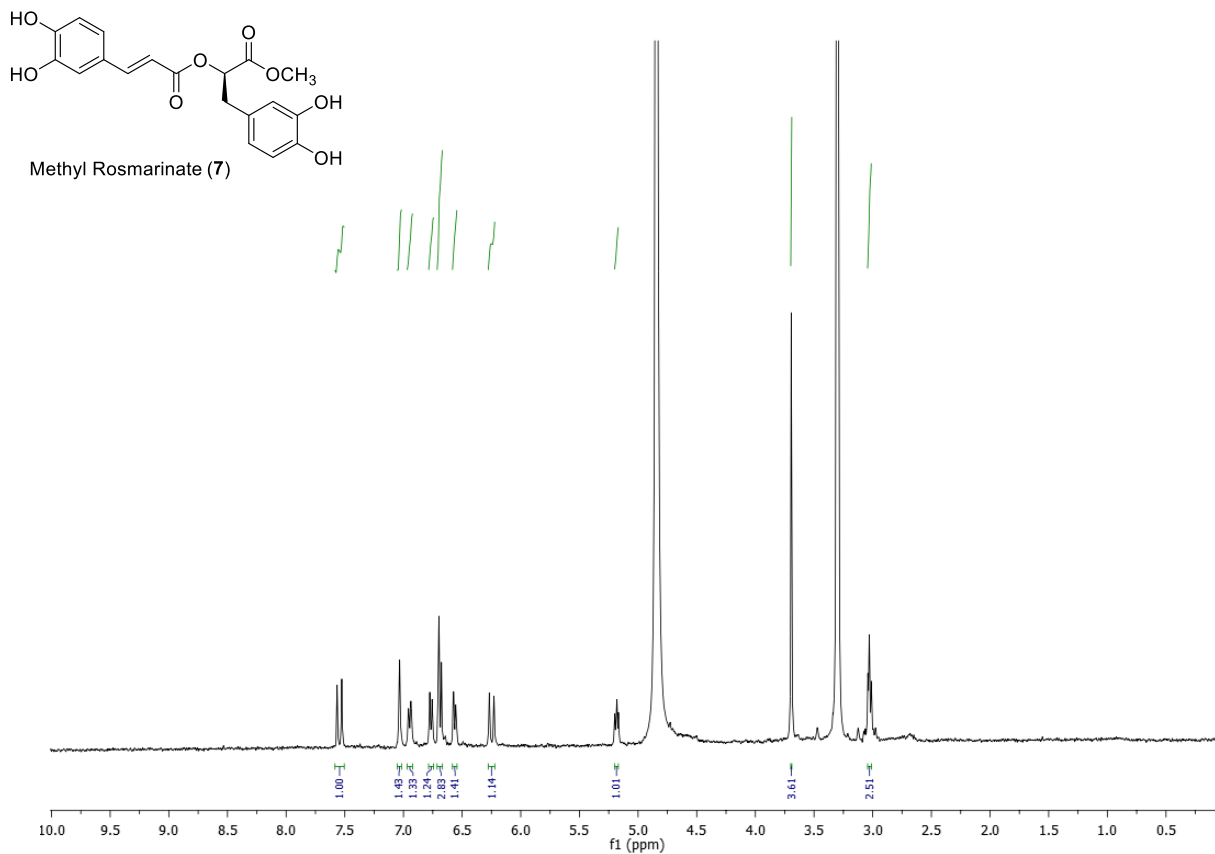

**Figure S13.** <sup>1</sup>H NMR (500 MHz, CD<sub>3</sub>OD) of compound **8**

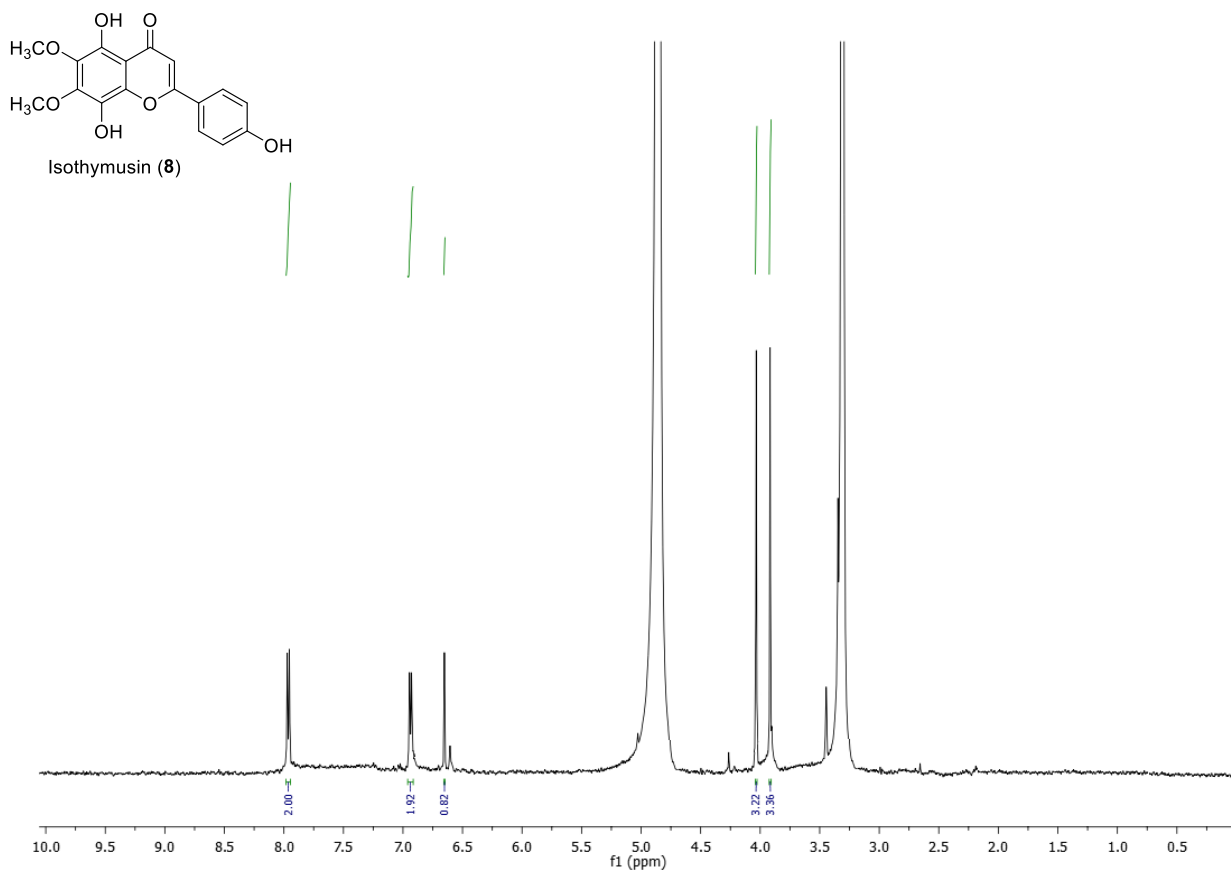

**Figure S14.**  $^1\text{H}$  NMR (500 MHz,  $\text{CD}_3\text{OD}$ ) of compound **9**

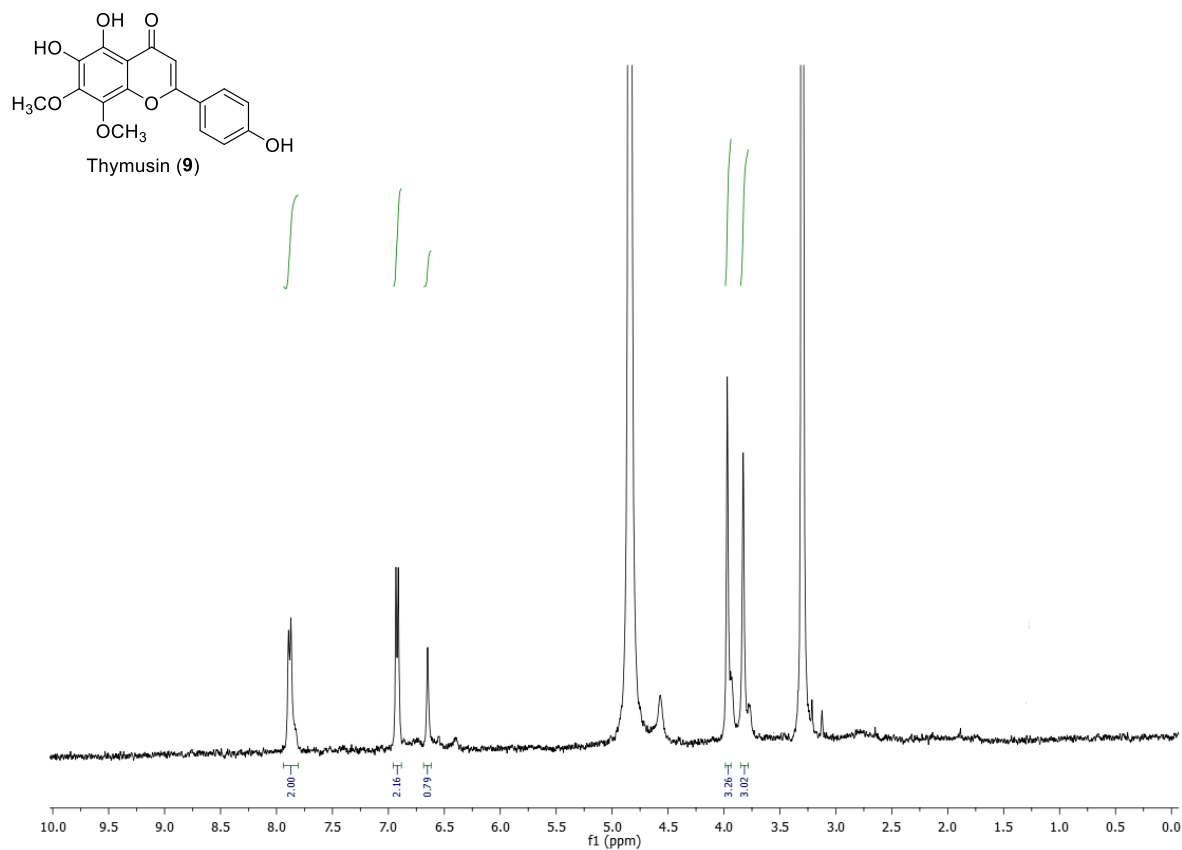

**Figure S15.**  $^1\text{H}$  NMR (500 MHz,  $\text{CD}_3\text{OD}$ ) of compound **10**

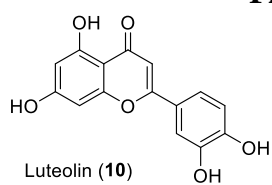



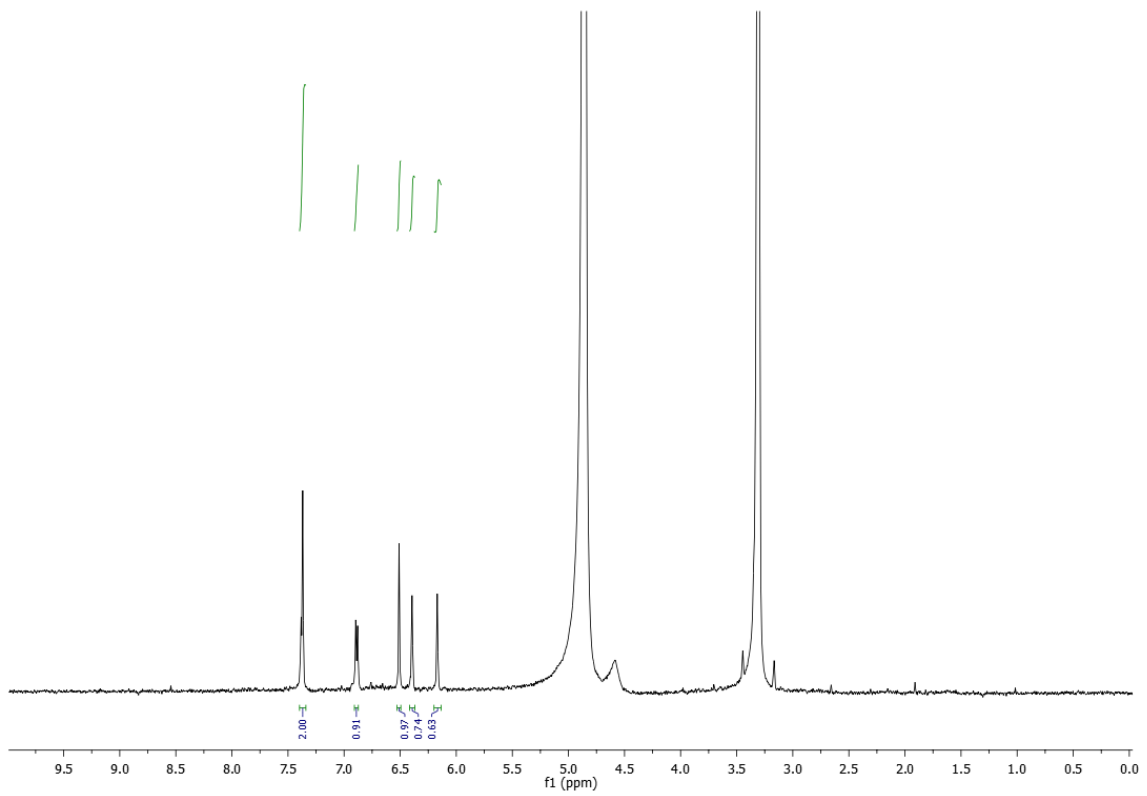

**Figure S16.**  $^1\text{H}$  NMR (500 MHz,  $\text{CD}_3\text{OD}$ ) of compound **11**

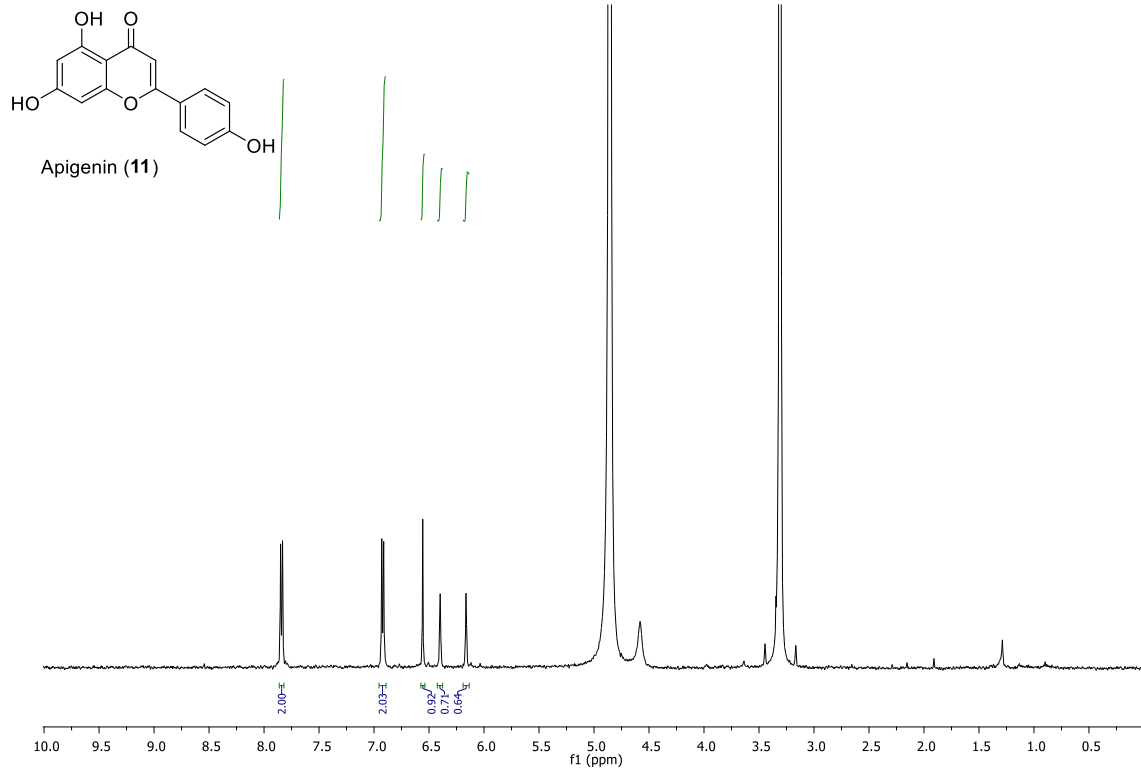

Supplement: molecules-24-01684-s001.pdf [file molecules-24-01684-s001.pdf]
